# Supplementary material for: Triple-mode tunable long-persistent luminescence in a 3D zinc-organic hybrid
Source: Royal Society of Chemistry journal article supplement (doi:10.1039/d1cc02389f), 2021-01-01
Supplement: d1cc02389f1.pdf [file d1cc02389f1.pdf]

## Electronic Supplemental Information

# Triple-Mode Tunable Long-persistent Luminescence in a 3D Zinc-Organic Hybrid

Yu-Juan Ma,<sup>a</sup> Xiaoyu Fang,<sup>a</sup> Guowei Xiao,<sup>a</sup> Bo Lu<sup>a</sup> and Dongpeng Yan<sup>\*abc</sup>

a. Beijing Key Laboratory of Energy Conversion and Storage Materials, College of Chemistry, Beijing Normal University, Beijing 100875, P. R. China. E-mail: yandp@bnu.edu.cn

b. Key Laboratory of Radiopharmaceuticals, Ministry of Education, Beijing Normal University, Beijing 100875, People's Republic of China.

c. College of Chemistry and Molecular Engineering, Zhengzhou University, Zhengzhou, 450001, China.

### Contents

Experimental section

Figure S1. The coordination mode of D-Cam and tib.

Figure S2. Oscilloscope traces of SHG signals of KDP and **1**.

Figure S3. IR plot of **1**.

Figure S4. The prompt excitation spectra of **1** at room temperature.

Figure S5. The decay and IRF spectra of **1**.

Figure S6. The PL spectra (a) and CIE coordinate (b) of **1** at room temperature.

Figure S7. The temperature-dependent emission spectra of **1**.

Figure S8. The excitation wavelength-dependent emission spectra.

Figure S9. The delayed excitation spectra of **1** at room temperature.

Figure S10. (a) Prompt and delayed PL emission spectra of tib ( $\lambda_{\text{ex}} = 307 \text{ nm}, 380 \text{ nm}$ ). (b) PL decay and fit curves obtained at room temperature.

Figure S11. (a) Prompt and delayed PL emission spectra of compound D-Cam ( $\lambda_{\text{ex}} = 267 \text{ nm}, 310 \text{ nm}$ ). (b) PL decay and fit curves obtained at room temperature.

Figure S12. Phosphorescence spectrum of D-Cam and absorption spectrum of tib.

Figure S13. The delayed emission spectra (a) and CIE coordinate (b) of **1** at 77 K.

Figure S14. Time-resolved emission spectra.

Figure S15. (a) RTP decay at 525 nm and 535 nm of **1** (Insert: photo-activable process).

Figure S16. The temperature-dependent emission spectra.

Figure S17. (a) PL decay and fitting curves obtained at 77 K and (b) 327 K.

Figure S18. PXRD plot of **1**.

Figure S19. TG plot of **1**.

Figure S20. Calculated molecular orbitals.

Table S1. Crystallographic data for **1** at 100 K.

Table S2. Selected bond lengths (Å) and angles (°) for **1** at 100K.

Table S3 Phosphorescence lifetimes ( $\tau$ ) of **1**.

## Experimental Section

### Materials and methods

All chemicals were reagent grade and used as purchased without further purification.

**Synthesis of 1:** Zn(NO<sub>3</sub>)<sub>2</sub>·6H<sub>2</sub>O (0.09g, 0.30 mmol), D-Cam (0.03 g, 0.15 mmol), tib (0.027g, 0.10 mmol) was added to mixed solution of 14 mL water and 1 mL DMF with a drop of concentrated HNO<sub>3</sub>, then sealed in a Teflon-lined autoclave (20 mL) and heated to 140 °C for 3 days, colorless crystals were obtained and washed with deionized water. Yield: ca. 31% based on tib. IR of **1** (KBr pellets, cm<sup>-1</sup>): 3422(s), 2963(w), 2876(w), 1605(s), 1508(s), 1385(s), 1287(m), 1242(m), 1076(s), 1018(m), 943(m), 872(m), 766(m), 687(m), 652(s), 536(w), 446(w).

The SHG measurements of the crystals samples were completed by a Nd:YAG laser with 1064 nm as fundamental frequency light. IR spectra was recorded on a Shimadzu IRAffinity-1 FT-IR spectrometer with KBr pellet. All luminescence data were measured on an FLS 980 fluorescence spectrometer. The absorption spectra were carried out on a Puxi Tu-1901 spectrophotometer with BaSO<sub>4</sub> reference. Thermogravimetric (TG) analysis was measured using a powder sample with a heating rate of 10°C K<sup>-1</sup> under N<sub>2</sub> atmosphere on a METTLER TOLEDO Thermogravimetric Analyzer. Powder X-ray diffraction (PXRD) data were recorded on a Shimadzu XRD-7000 (3KW) X-ray diffractometer. Simulated curve of PXRD was exported by the single-crystal data and diffraction-crystal module of the Mercury (Hg) program available free of charge *via* the Internet at <http://www.iucr.org>.

### X-ray Crystallography.

The single-crystal X-ray diffraction data of **1** was collected on a Rigaku XtalLAB Synergy diffractometer at 100(10) K with Cu-K $\alpha$  radiation ( $\lambda = 1.54184 \text{ \AA}$ ). SHELX-2016 software was used to solve and refine the structure.<sup>1</sup> Crystallographic data for **1** are listed in Table S1, and selected bond lengths and angles are listed in Table S2. Full crystallographic data for **1** has been deposited with the CCDC (2079214).

## Calculation Details

All DFT calculation were carried out with the D.01 revision of the Gaussian 09 program package<sup>2</sup>, using the cam-b3lyp functional with the 6-311G\* basis set for C, H, O and N, and lanl2dz basis set for the Zn element. The D3 Grimme's dispersion term with Becke-Johnson damping was added to the cam-B3LYP functional to get a better description of the intramolecular non-covalent interactions. In this work, the frontier orbitals were analyzed by Multiwfn<sup>3</sup> and VMD<sup>4</sup>.

## References

- [S1] G. Sheldrick, *Acta Crystallogr., Sect. C: Struct. Chem.*, 2015, **71**, 3–8.
- [S2] M. J. Frisch, G. W. Trucks, H. B. Schlegel, G. E. Scuseria, M. A. Robb, J. R. Cheeseman, G. Scalmani, V. Barone, B. Mennucci, G. A. Petersson, H. Nakatsuji, M. Caricato, X. Li, H. P. Hratchian, A. F. Izmaylov, J. Bloino, G. Zheng, J. L. Sonnenberg, M. Hada, M. Ehara, K. Toyota, R. Fukuda, J. Hasegawa, M. Ishida, T. Nakajima, Y. Honda, O. Kitao, H. Nakai, T. Vreven, J. A. Montgomery, Jr, J. E. Peralta, F. Ogliaro, M. Bearpark, J. J. Heyd, E. Brothers, K. N. Kudin, V. N. Staroverov, R. Kobayashi, J. Normand, K. Raghavachari, A. Rendell, J. C. Burant, S. S. Iyengar, J. Tomasi, M. Cossi, N. Rega, N. J. Millam, M. Klene, J. E. Knox, J. B. Cross, V. Bakken, C. Adamo, J. Jaramillo, R. Gomperts, R. E. Stratmann, O. Yazyev, A. J. Austin, R. Cammi, C. Pomelli, J. W. Ochterski, R. L. Martin, K. Morokuma, V. G. Zakrzewski, G. A. Voth, P. Salvador, J. J. Dannenberg, S. Dapprich, A. D. Daniels, O. Farkas, J. B. Foresman, J. V. Ortiz, J. Cioslowski and D. J. Fox, Gaussian 09, Revision D.01, Gaussian, Inc., Wallingford, CT, 2009.
- [S3] T. Lu; F. Chen, Multiwfn: A multifunctional wavefunction analyzer. *J. Comput. Chem.*, 2012, **33**, 580-592
- [S4] W. Humphrey; A. Dalke; K. Schulten, VMD: Visual molecular dynamics. *J. Mol. Graph.*, 1996, **14**, 33-38.

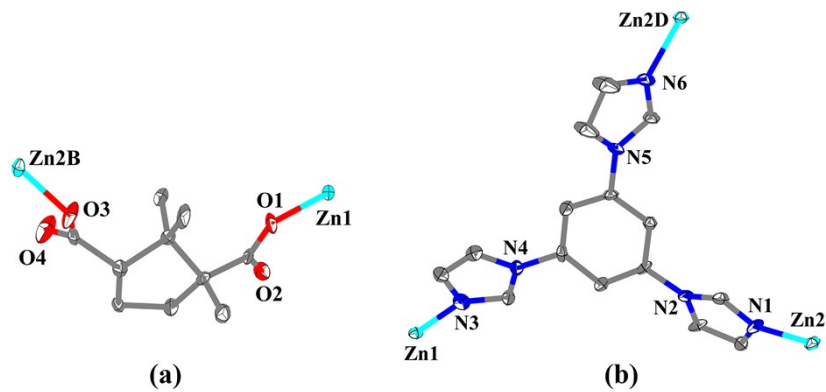

Figure S1. The coordination modes of D-Cam (a) and tib (b).

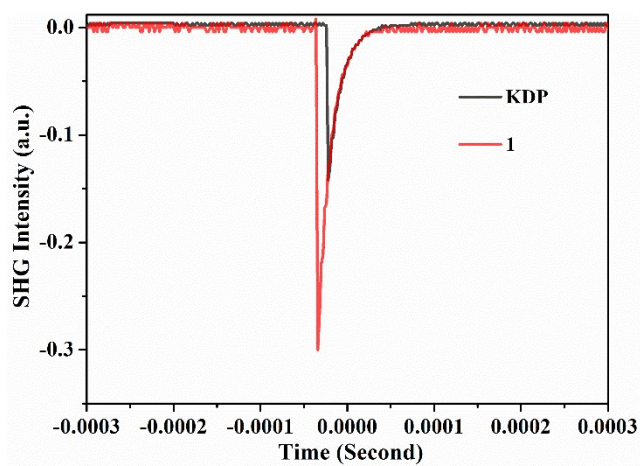

Figure S2. Oscilloscope traces of SHG signals of KDP and 1.

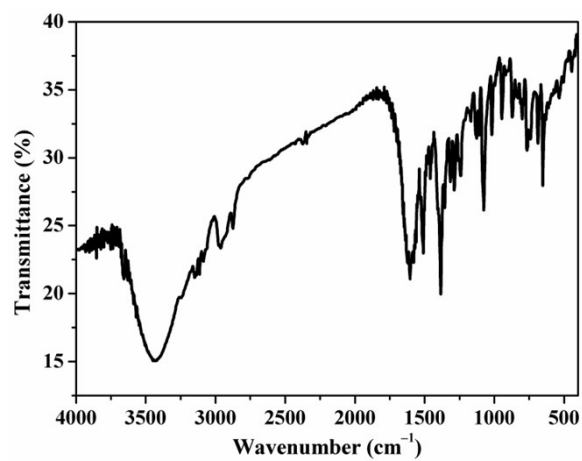

Figure S3. IR plot of 1.

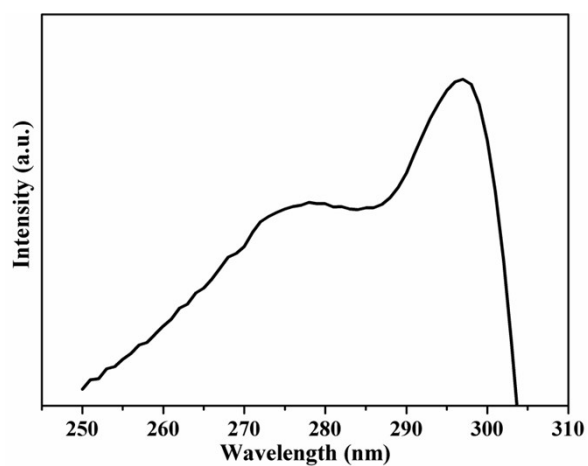

Figure S4. The prompt excitation spectra of **1** at room temperature.

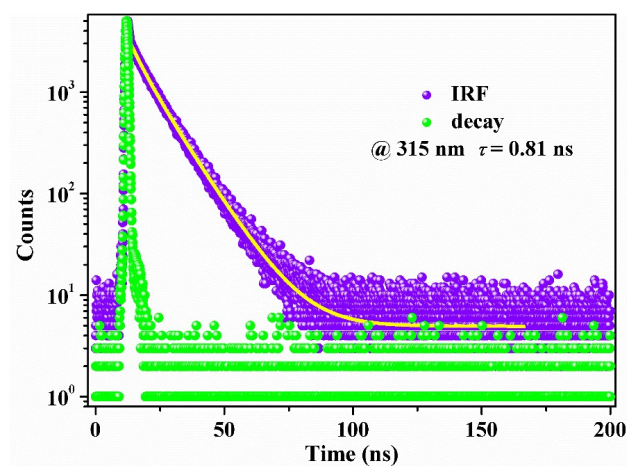

Figure S5. The decay and IRF spectra of **1**.

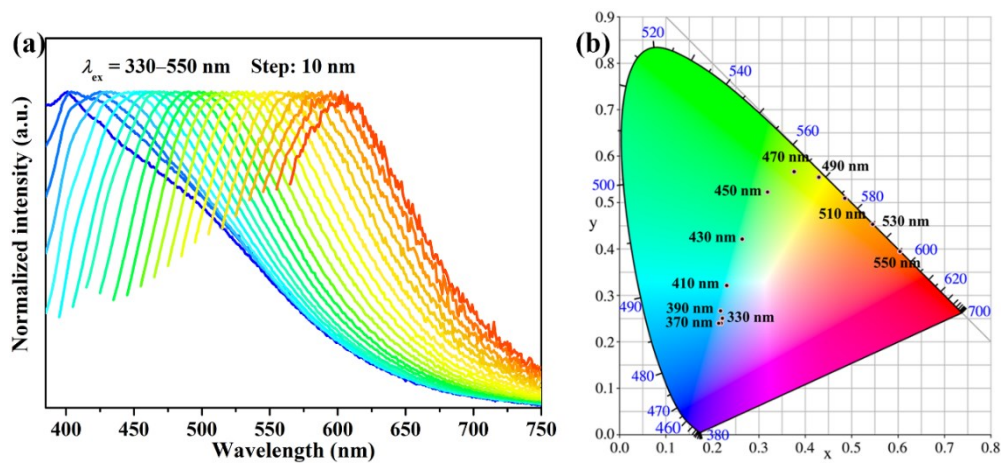

Figure S6. The PL spectra (a) and CIE coordinate (b) of **1** at room temperature.

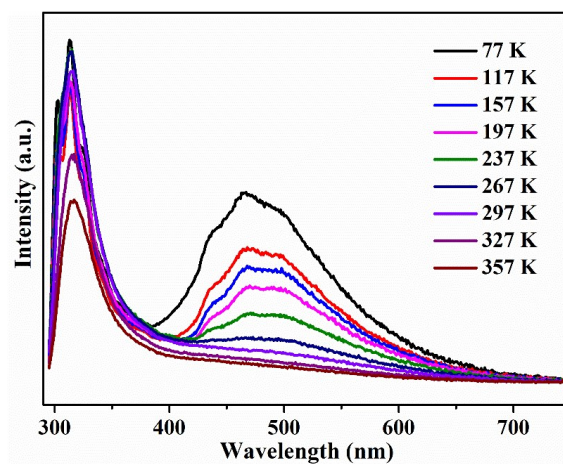

Figure S7. The temperature-dependent emission spectra of **1**.

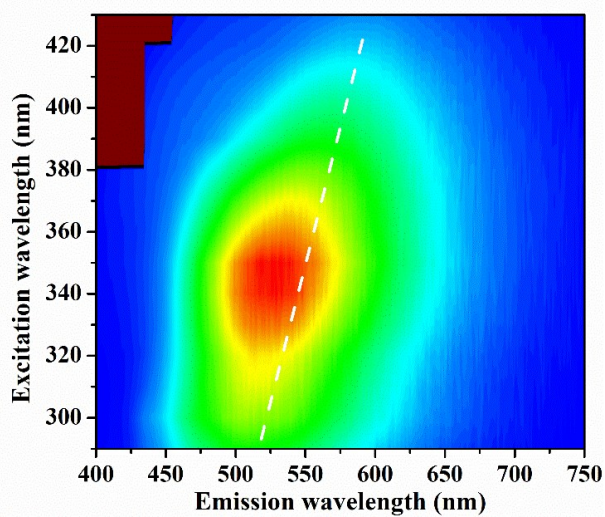

Figure S8. The excitation wavelength-dependent emission spectra.

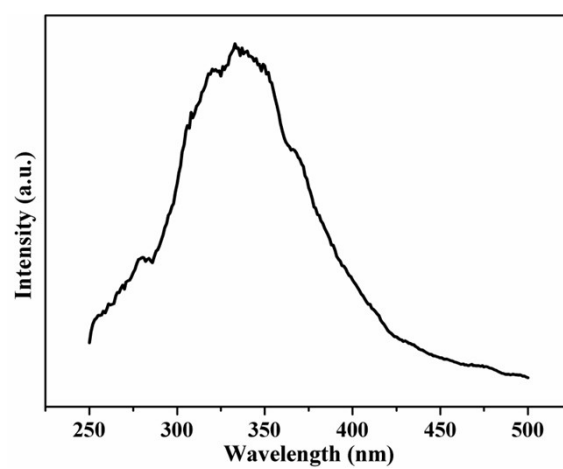

Figure S9. The delayed excitation spectra of **1** at room temperature.

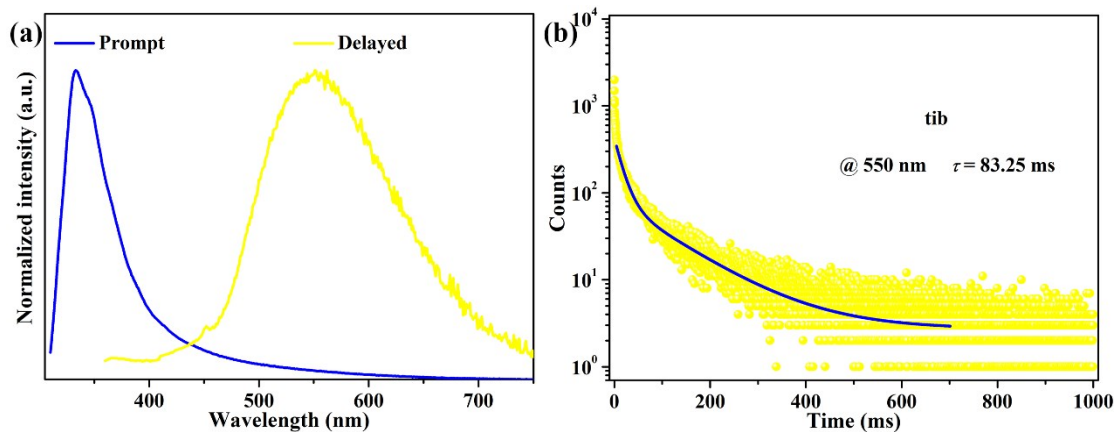

Figure S10. (a) Prompt and delayed PL emission spectra of tib ( $\lambda_{\text{ex}} = 307$  nm, 380 nm). (b) PL decay and fit curves obtained at room temperature.

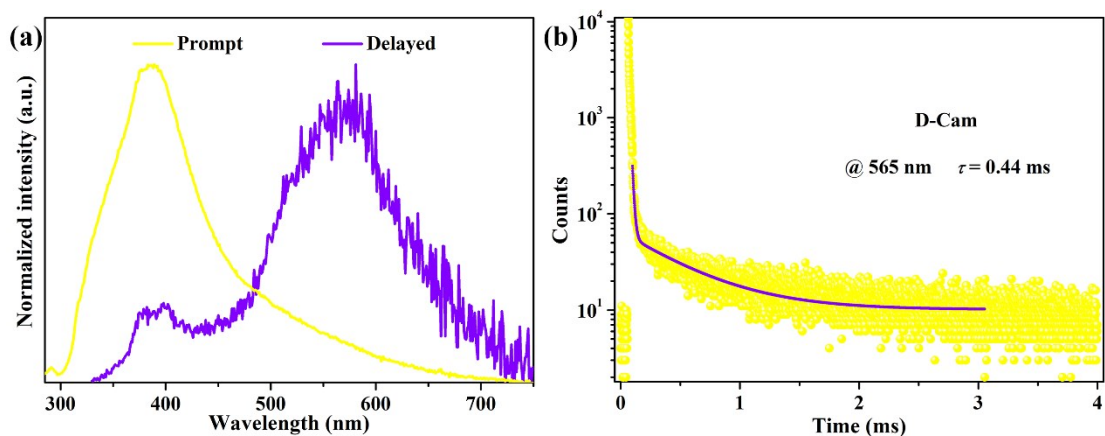

Figure S11. (a) Prompt and delayed PL emission spectra of **D-Cam** ( $\lambda_{\text{ex}} = 267$  nm, 310 nm). (b) PL decay and fitting curves obtained at room temperature.

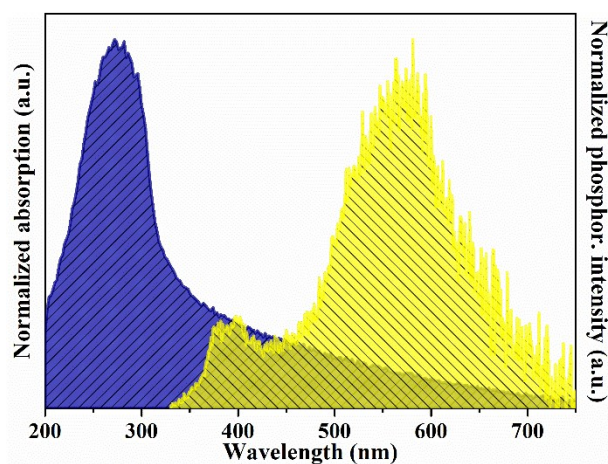

Figure S12. Normalized phosphorescence spectrum of **D-Cam** and absorption spectrum of **tib**.



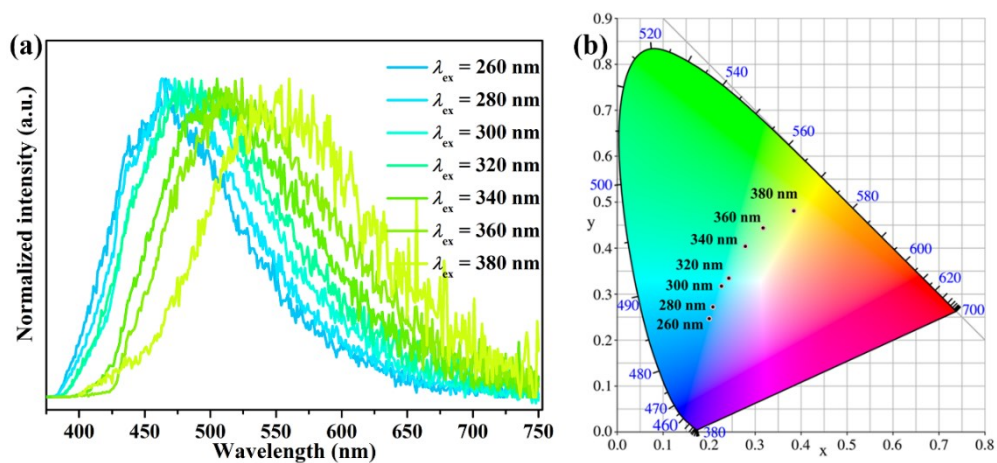

Figure S13. The delayed emission spectra (a) and CIE coordinate (b) of **1** at 77 K.

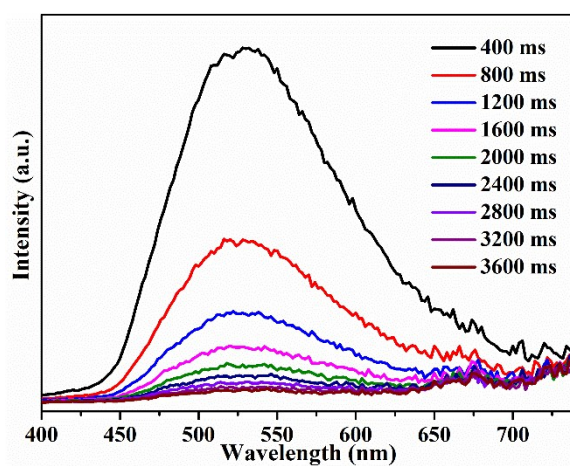

Figure S14. Time-resolved emission spectra ( $\lambda_{ex} = 333$  nm).

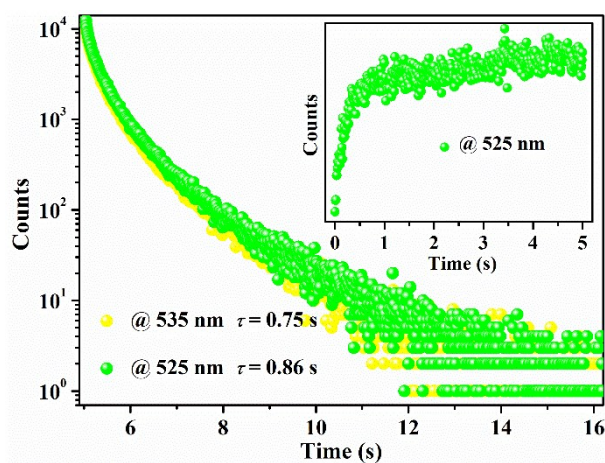

Figure S15. (a) RTP decay at 525 nm and 535 nm of **1** (Insert: photo-activable process).

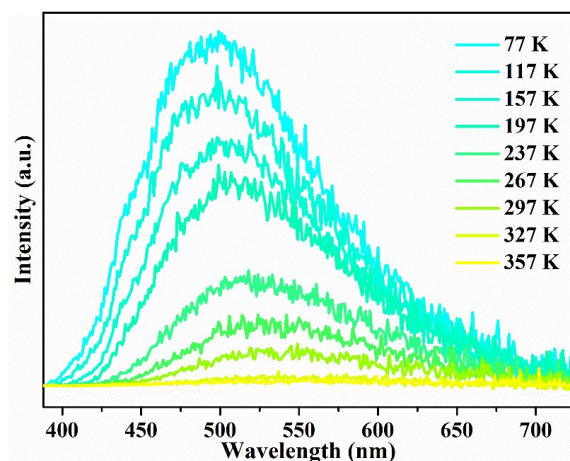

Figure S16. The temperature-dependent emission spectra ( $\lambda_{\text{ex}} = 333\text{nm}$ ).

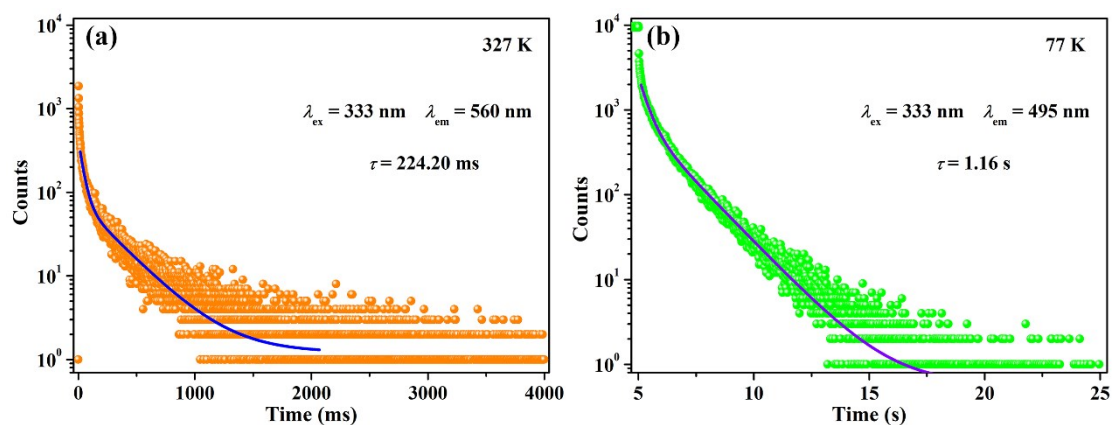

Figure S17. (a) PL decay and fitting curves obtained at 77 K and (b) 327 K.

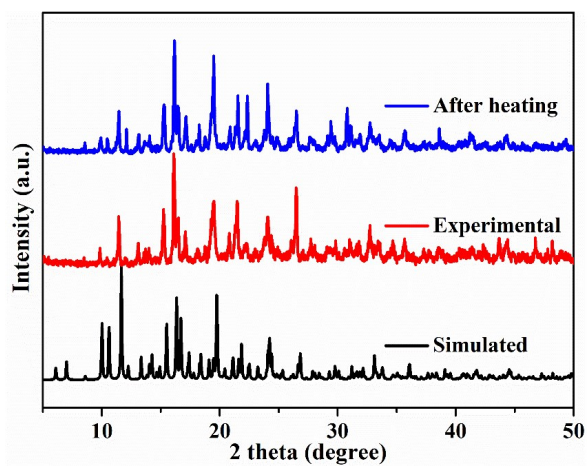

Figure S18. PXRD and simulated profiles of **1**.

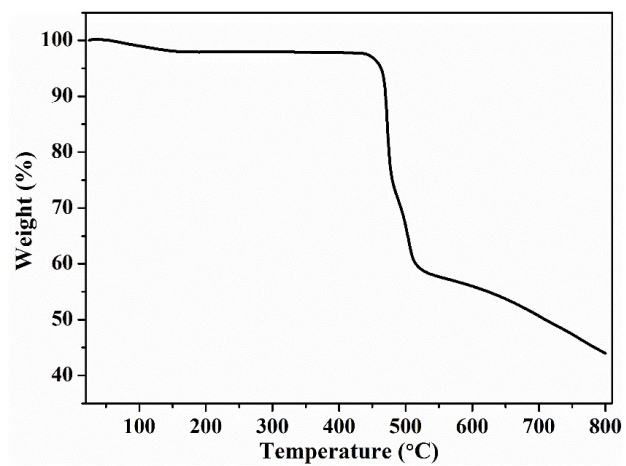

Figure S19. TG profile of 1.

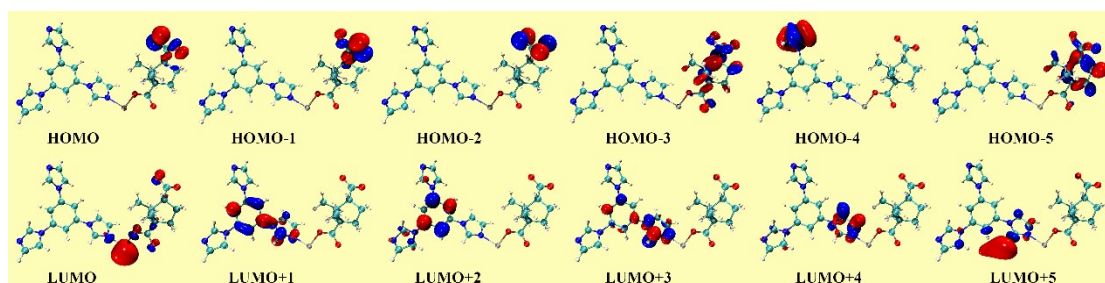

Figure S20. Calculated molecular orbitals.

**Table S1.** Crystallographic data for **1** at 100K

|                                                                             | <b>1</b>                                                                        |        |
|-----------------------------------------------------------------------------|---------------------------------------------------------------------------------|--------|
| Formula                                                                     | C <sub>60</sub> H <sub>70</sub> N <sub>12</sub> O <sub>14</sub> Zn <sub>3</sub> |        |
| Mr (g·mol <sup>-1</sup> )                                                   | 1379.39                                                                         |        |
| Space group                                                                 | P2 <sub>1</sub> 2 <sub>1</sub> 2                                                |        |
| Crystal system                                                              | Orthorhombic                                                                    |        |
| <i>a</i> (Å)                                                                | 17.6445(2)                                                                      |        |
| <i>b</i> (Å)                                                                | 25.2002(3)                                                                      |        |
| <i>c</i> (Å)                                                                | 6.87410(10)                                                                     |        |
| <i>V</i> (Å <sup>3</sup> )                                                  | 3056.53(7)                                                                      |        |
| <i>Z</i>                                                                    | 2                                                                               |        |
| <i>F</i> (000)                                                              | 1432                                                                            |        |
| <i>D<sub>c</sub></i> (gcm <sup>-3</sup> )                                   | 1.499                                                                           |        |
| <i>μ</i> (mm <sup>-1</sup> )                                                | 2.005                                                                           |        |
| <i>R</i> <sub>int</sub>                                                     | 0.0293                                                                          |        |
|                                                                             | -21 ≤ <i>h</i> ≤ 21                                                             |        |
| limiting indices                                                            | -30 ≤ <i>k</i> ≤ 21                                                             |        |
|                                                                             | -8 ≤ <i>l</i> ≤ 8                                                               |        |
| Collected reflections                                                       | 21484                                                                           |        |
| Unique reflections                                                          | 5930                                                                            |        |
| GOF on <i>F</i> <sup>2</sup>                                                | 1.039                                                                           |        |
| <i>R</i> <sub>1</sub> , <i>wR</i> <sub>2</sub> [ <i>I</i> > 2σ( <i>I</i> )] | 0.0581                                                                          | 0.1560 |
| <i>R</i> <sub>1</sub> , <i>wR</i> <sub>2</sub> [all data]                   | 0.0588                                                                          | 0.1568 |

$${}^a R_1 = \sum \frac{\|F_o\| - |F_c|}{\sum |F_o|} \quad {}^b wR_2 = \left\{ \frac{\sum [w(F_o^2 - F_c^2)^2]}{\sum w(F_o^2)^2} \right\}^{1/2}.$$

**Table S2.** Selected bond lengths (Å) and angles (°) for **1** at 100 K

| <b>1</b>            |          |                     |           |
|---------------------|----------|---------------------|-----------|
| Zn(1)-O(1)          | 1.943(5) | Zn(2)-O(5A)         | 1.965(10) |
| Zn(1)-O(1)#1        | 1.943(5) | Zn(2)-O(5)          | 2.020(12) |
| Zn(1)-N(3)          | 2.046(5) | Zn(2)-N(1)          | 2.021(5)  |
| Zn(1)-N(3)#1        | 2.046(5) | Zn(2)-N(6)#3        | 2.024(6)  |
| Zn(2)-O(3)#2        | 1.940(5) | Zn(2)-O(6A)         | 2.334(10) |
| O(1)-Zn(1)-O(1)#1   | 121.3(3) | O(5A)-Zn(2)-N(1)    | 109.2(3)  |
| O(1)-Zn(1)-N(3)     | 90.8(2)  | O(5)-Zn(2)-N(1)     | 104.6(3)  |
| O(1)#1-Zn(1)-N(3)   | 116.3(2) | O(3)#2-Zn(2)-N(6)#3 | 99.0(3)   |
| O(1)-Zn(1)-N(3)#1   | 116.3(2) | O(5)-Zn(2)-N(6)#3   | 122.8(4)  |
| O(1)#1-Zn(1)-N(3)#1 | 90.8(2)  | N(1)-Zn(2)-N(6)#3   | 103.6(2)  |
| N(3)-Zn(1)-N(3)#1   | 124.5(3) | O(3)#2-Zn(2)-O(6A)  | 87.6(3)   |
| O(3)#2-Zn(2)-O(5A)  | 114.5(3) | O(5A)-Zn(2)-O(6A)   | 60.2(4)   |
| O(3)#2-Zn(2)-O(5)   | 101.9(4) | N(1)-Zn(2)-O(6A)    | 89.1(3)   |
| O(3)#2-Zn(2)-N(1)   | 127.0(2) | N(6)#3-Zn(2)-O(6A)  | 157.4(3)  |

Symmetry codes: #1: -x+1, -y+2, z; #2: -x+3/2, y-1/2, -z+1; #3: x-1/2, -y+3/2, -z; #4: -x+1, -y+1, z; #5: x+1/2, -y+3/2, -z; #6: -x+3/2, y+1/2, -z+1.

**Table S3** Phosphorescence lifetimes ( $\tau$ ) of **1**.

| Compound     | Temperature | Wavelength<br>(nm) | Excitation<br>light | $\tau_1$<br>(ms) | $A_1$<br>(%) | $\tau_2$<br>(ms) | $A_2$<br>(%) | $\langle\tau\rangle$<br>(ms) | $\chi^2$ |
|--------------|-------------|--------------------|---------------------|------------------|--------------|------------------|--------------|------------------------------|----------|
| <b>1</b>     | RT          | 525                | uF2                 | 150.2            | 34.72        | 701.4            | 65.28        | 510.0                        | 1.260    |
|              |             | 525                | Xe                  | 405.2            | 47.72        | 1270             | 52.28        | 857.3                        | 1.217    |
|              |             | 535                | Xe                  | 343.8            | 50.62        | 1162             | 49.38        | 747.8                        | 1.230    |
|              | 327 K       | 550                | uF2                 | 40.24            | 30.28        | 304.1            | 69.72        | 224.2                        | 1.176    |
|              | 77 K        | 495                | uF2                 | 373.0            | 32.87        | 1540             | 67.13        | 1156.4                       | 1.147    |
| <b>tib</b>   | RT          | 550                | uF2                 | 16.93            | 34.19        | 117.7            | 65.81        | 83.2                         | 1.237    |
| <b>D-Cam</b> | RT          | 565                | uF2                 | 0.014            | 14.16        | 0.502            | 85.84        | 0.44                         | 1.141    |

$\langle\tau\rangle = \sum A_j \tau_j^2 / \sum A_j \tau_j$ ,  $j=1, 2, 3, \dots$ ; RT = Room temperature.
